# Supplementary material for: Eco-evolutionary significance of “loners”
Source: PubMed Central journal article supplement (PMC7081983; doi:10.1371/journal.pbio.3000642), 2020-03-19
Supplement: pbio.3000642.s011.pdf [file pbio.3000642.s011.pdf]

| Theory                        |                      |                                                                              |                    |                    | Experiment                                                   |                                                                                  |                   |
|-------------------------------|----------------------|------------------------------------------------------------------------------|--------------------|--------------------|--------------------------------------------------------------|----------------------------------------------------------------------------------|-------------------|
|                               | Symbol               | Definition                                                                   | Units              | Model value        | Experimental observable                                      | Exp. value                                                                       | Ref.              |
| Population partitioning model | $\lambda$            | Strain specific <i>P</i> -to- <i>A</i> transition rate                       | hour <sup>-1</sup> | Varied             |                                                              | --                                                                               |                   |
|                               | $\theta$             | Strain-specific sensitivity threshold                                        | Kg/cm <sup>2</sup> | Varied             |                                                              | --                                                                               |                   |
|                               | $\gamma$             | Strain-specific signaling rate                                               | Kg/hour            | Varied             |                                                              | --                                                                               |                   |
|                               | $v$                  | Strain-specific <i>A</i> -cells velocity                                     | μm/min             | Varied around 12   | Velocity of aggregating cells                                | 12μm/min                                                                         | [53]              |
|                               | $\tilde{v}$          | Rescaled cell velocity ( $D \rightarrow \infty$ limit; see Sup. Information) | hour <sup>-1</sup> | Varied             |                                                              | --                                                                               |                   |
|                               | $N_0$                | Initial number of <i>P</i> -cells                                            | # cells            | Varied             |                                                              | --                                                                               |                   |
|                               | $\eta$               | Decay constant of the signal                                                 | min <sup>-1</sup>  | 1.2                | Parameter used for model fitting.                            |                                                                                  |                   |
|                               | $D$                  | Signal diffusion coefficient                                                 | cm <sup>2</sup> /s | Varied             | cAMP diff. coeff. (2% agar)<br>CMF diff. coeff. (water film) | 4.4x10 <sup>-6</sup> cm <sup>2</sup> /s<br>8x10 <sup>-7</sup> cm <sup>2</sup> /s | [54–56]           |
| Resource competition model    | $\mu$                | Decrease rate of survival probability                                        | hour <sup>-1</sup> | 2x10 <sup>-3</sup> | Number of alive/moving loners versus time                    | 2x10 <sup>-3</sup> hour <sup>-1</sup>                                            | Fitting from [14] |
|                               | $\zeta$              | Resistance to starvation parameter                                           | --                 | 2                  |                                                              | 2                                                                                |                   |
|                               | $T_{sur}$            | Loner maximum lifespan                                                       | hour               | 240                |                                                              | 240 hour                                                                         |                   |
|                               | $T_{ger}$            | Spore germination time                                                       | hour               | 4                  | Mean germination time 1-3 days old spores                    | 4-8 hour                                                                         | [58]              |
|                               | $\delta$             | Spore death rate                                                             | hour <sup>-1</sup> | 2x10 <sup>-4</sup> |                                                              | --                                                                               |                   |
|                               | $c$                  | Maximum division rate                                                        | hour <sup>-1</sup> | 0.173              | Doubling time                                                | 4 hour                                                                           | [50]              |
|                               | $s$                  | Spore:stalk ratio                                                            | --                 | 0.8                | Spore:stalk proportion                                       | ~ 80:20                                                                          | [57]              |
|                               | $\omega$             | Spore germination success                                                    | --                 | 0.63               | Germination efficiency                                       | 0.63                                                                             | [9]               |
|                               | $R_0, X_0$           | Food pulse size; normalized initial population size                          | # cells            | 3x10 <sup>5</sup>  |                                                              | --                                                                               |                   |
|                               | $R_{1/2}$            | Resources consumption half saturation constant                               | --                 | 0.1 $R_0$          |                                                              | --                                                                               |                   |
| $\bar{T}_{st}$                | Mean starvation time | hour                                                                         | Varied             |                    | --                                                           |                                                                                  |                   |
